# Supplementary material
Source: Springer Nature journal article supplement (https://www.springermedizin.de/resource/supplementary/13023_2013_662_MOESM1_ESM.pdf/9642614)
Supplement: MOESM1 [file 9642614]

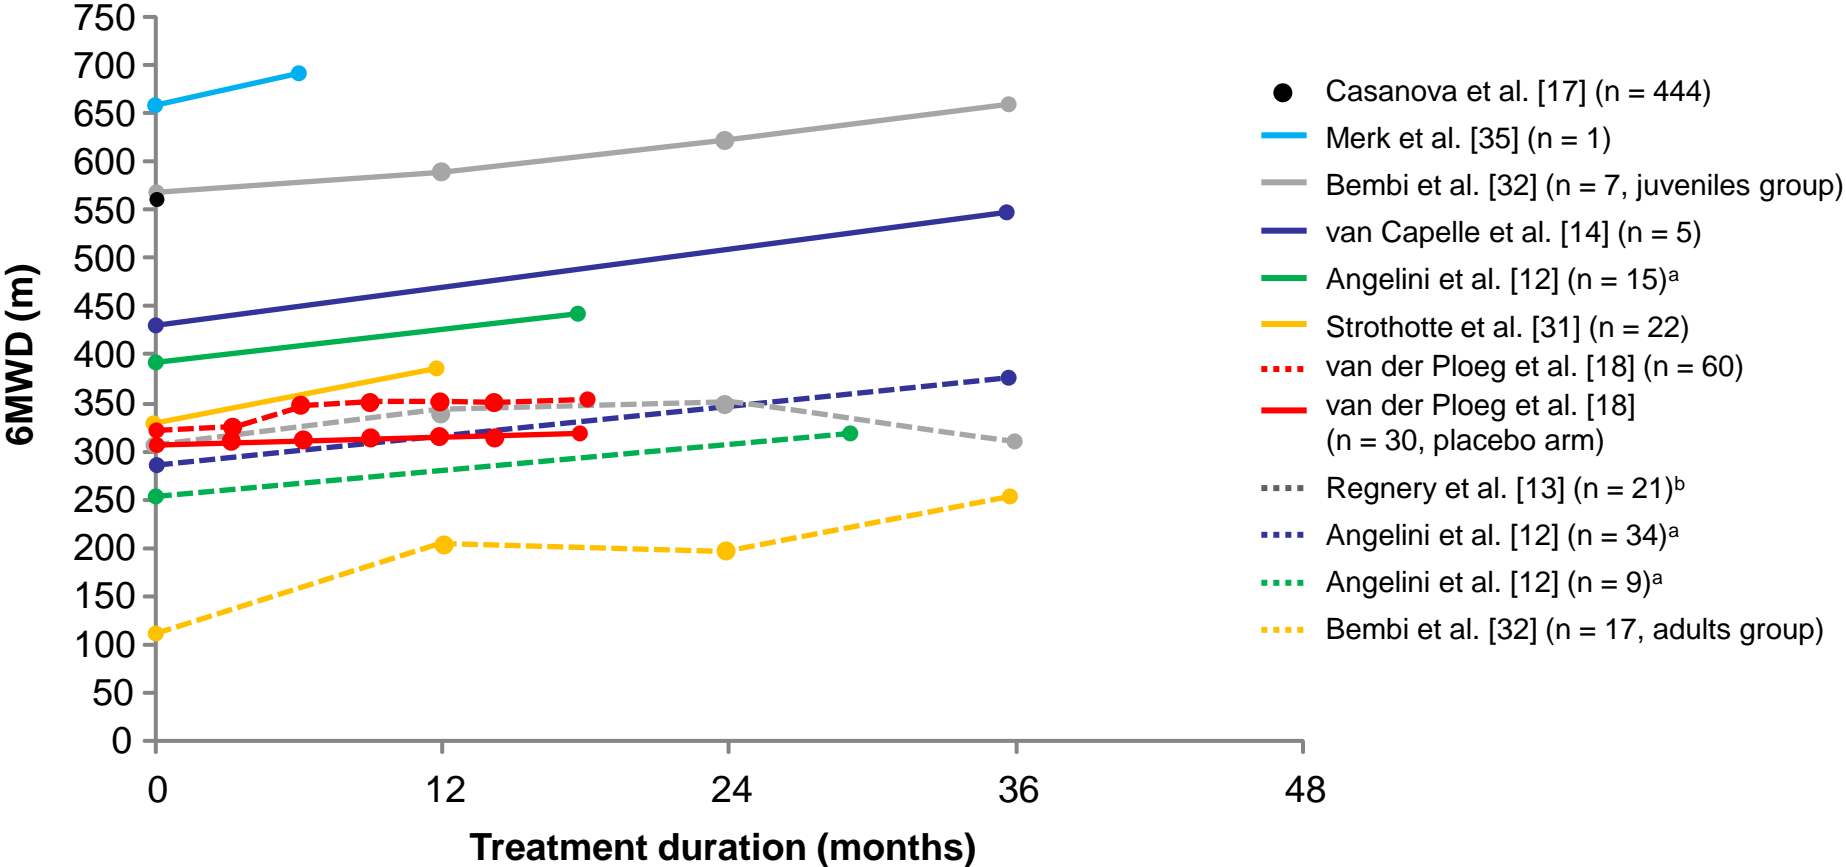

<sup>a</sup>Values separated by duration of treatment into 3 groups

<sup>b</sup>Values provided for same patients at multiple time points
